# Supplementary material for: Nicotinic Acid Improves Endurance Performance of Mice Subjected to Treadmill Exercise
Source: PubMed Central journal article supplement (PMC7240961; doi:10.3390/metabo10040138), 2020-04-01
Supplement: metabolites-10-00138-s001.pdf [file metabolites-10-00138-s001.pdf]

## Supplementary materials

Table S1 Sources of diet components

| Component (product name)                        | Source (Company, City, Country)                         |
|-------------------------------------------------|---------------------------------------------------------|
| Maize starch (Maisita – Native Maisstärke)      | Agrana Beteiligungs-AG, Gmünd, Austria                  |
| Casein (Nährkasein, Säurekasein 110 Mesh)       | Meggle, Wasserburg, Germany                             |
| Saccharose (Puderzucker)                        | Suedzucker, Mannheim, Germany                           |
| Soybean oil (Heidenreich – Soja 3-Plus)         | Karl Heidenreich GmbH, Mannheim, Germany                |
| Cellulose (Arbocel – Rohfaserkonzentrat, Typ R) | Rettenmaier & Söhne GmbH + Co KG,<br>Rosenberg, Germany |
| Mineral mix <sup>1</sup>                        | Self-made                                               |
| Vitamin mix <sup>2</sup>                        | Self-made                                               |
| L-Cystein                                       | Sigma Aldrich, St. Louis, USA                           |
| Supplemental NA                                 | Lonza, Basel, Switzerland                               |

### <sup>1</sup>Components mineral mix

|                                                         |                                 |
|---------------------------------------------------------|---------------------------------|
| MgSO <sub>4</sub> x 7H <sub>2</sub> O                   | Roth, Karlsruhe, Germany        |
| CaCO <sub>3</sub>                                       | Bergmann, Kasendorf, Germany    |
| NaCl                                                    | Roth, Karlsruhe, Germany        |
| FeSO <sub>4</sub> x 7H <sub>2</sub> O                   | Merck, Darmstadt, Germany       |
| ZnSO <sub>4</sub> x 7H <sub>2</sub> O                   | Grüssing, Vilsum, Germany       |
| MnSO <sub>4</sub> x H <sub>2</sub> O                    | Roth, Karlsruhe, Germany        |
| CuSO <sub>4</sub> x 5H <sub>2</sub> O                   | Roth, Karlsruhe, Germany        |
| KI                                                      | Sigma Aldrich, St. Louis, USA   |
| NaFl                                                    | Merck, Darmstadt, Germany       |
| CrK(SO <sub>4</sub> ) <sub>2</sub> x 12H <sub>2</sub> O | Merck, Darmstadt, Germany       |
| LiCl                                                    | Sigma Aldrich, St. Louis, USA   |
| Na <sub>2</sub> MoO <sub>4</sub> x 2H <sub>2</sub> O    | Acros organics, New Jersey, USA |
| Na <sub>2</sub> SeO <sub>3</sub> x 5H <sub>2</sub> O    | Merck, Darmstadt, Germany       |

|                                          |                              |
|------------------------------------------|------------------------------|
| KH <sub>2</sub> PO <sub>4</sub>          | Roth, Karlsruhe, Germany     |
| <sup>2</sup> Components vitamin mix      |                              |
| Choline chloride (50% S)                 | Bergophor, Kulmbach, Germany |
| Microvit A Promix 1000, 1.000.000 I.E./g | Bergophor, Kulmbach, Germany |
| Microvit B1 Promix Thiamine Mono, 100%   | Bergophor, Kulmbach, Germany |
| Microvit B2 Supra 80, 80%                | Bergophor, Kulmbach, Germany |
| Microvit B3 Promix Niacin 99.0%          | Bergophor, Kulmbach, Germany |
| Microvit B5 Promix D-Calpan, 100%        | Bergophor, Kulmbach, Germany |
| Microvit B6 Promix Pyridoxine, 98%       | Bergophor, Kulmbach, Germany |
| Microvit H Promix Biotin, 2%             | Bergophor, Kulmbach, Germany |
| Microvit B9 Supra 100, 100%              | Bergophor, Kulmbach, Germany |
| Microvit B12 Promix 1000, 1.0%           | Bergophor, Kulmbach, Germany |
| Microvit D3 Promix 500, 500.000 I.E./g   | Bergophor, Kulmbach, Germany |
| Microvit E Promix 50, 500 I.E./g         | Bergophor, Kulmbach, Germany |
| Microvit K3 Promix MNB 51%               | Bergophor, Kulmbach, Germany |

---

Table S2 Characteristics of gene specific primers used for qPCR

| Gene symbol            | Primer sequence (5'-3', forward, reverse)         | Product size (bp) | NCBI GenBank accession number |
|------------------------|---------------------------------------------------|-------------------|-------------------------------|
| <i>Reference genes</i> |                                                   |                   |                               |
| <i>Atp5b</i>           | GCCAGAGACTATGCGGCGCA, CCCCCAAATGCTGGGCCACC        | 187               | NM_016774                     |
| <i>Canx</i>            | GTCCCCGGGAGGCTCGAGATAGAT, ACCTCCCCTGTTGGAAGTGGAGC | 234               | NM_007597                     |
| <i>Cycl</i>            | CGCAATGGAAGCTGCCGGGA, CGCAATGGAAGCTGCCGGGA        | 99                | NM_025567                     |
| <i>Target genes</i>    |                                                   |                   |                               |
| <i>Acadl</i>           | CACAGGCCCTGGCTTCAGCC, ATGCCATGGGCAGGCGATCG        | 303               | NM_007381                     |
| <i>Acadm</i>           | AGGTTTCAAGATCGCAATGG, CTCCTTGGTGCTCCACTAGC        | 152               | NM_007382                     |
| <i>Atf4</i>            | TTCCTCGAATCCAGCAAAGCCC, CTCCAACATCCAATCTGTCCGG    | 286               | NM_009716                     |
| <i>Casp12</i>          | GATGGAGAAGGAGGGACGAACAC, CACCAGGAATGTGCTGTCTGAGG  | 235               | NM_009808                     |
| <i>Clpp</i>            | CACACCAAGCAGAGCCTACA, TCCAAGATGCCAAACTCTTG        |                   | NM_017393                     |
| <i>Cox4i1</i>          | CTTCGAGCACATGGGAGTGT, ATCAGAACGAGCGCAGTGAA        | 296               | NM_009941                     |
| <i>Ddit3</i>           | AGCCAGAATAACAGCCGGAACC, GGGACTCAGCTGCCATGACTG     | 117               | NM_007837                     |
| <i>Dnajc3</i>          | CTGCATGGACACAGGTCCCAG, AGGCTGGACACCCCTACCTC       | 217               | NM_008929                     |
| <i>Gadd34</i>          | GCGGCTCAGATTGTTCAAAGCC, AGATGGGTTTCTAAGGCGTGCC    | 271               | NM_008654                     |
| <i>Gapdh</i>           | CAACGACCCCTTCATTGAC, AGACTCCACGACATACTCAG         | 196               | NM_001289726                  |
| <i>Gpx1</i>            | GTCCACCGTGTATGCCTTCT, TCTGCAGATCGTTCATCTCG        | 152               | NM_008160                     |
| <i>Gys1</i>            | AGGGGATGAATGGGGTGACA, CATTTCGTGGAAGTGGGCAAC       | 384               | NM_030678                     |
| <i>Herpud1</i>         | CGCAGTTGGAGTGTGAGTCGC, ACCTTTGTGCTGGTTTCTGGC      | 216               | NM_022331                     |
| <i>Hmox1</i>           | GATTTGTCTGAGGCCTTGAAG, CTAAAGCCTTCTCTGGACAC       | 111               | NM_010442                     |

|                 |                                                 |     |              |
|-----------------|-------------------------------------------------|-----|--------------|
| <i>Hspa5</i>    | TCATCGGACGCACTTGAATGAC, CGCTGGGCATCATTGAAGTAAGC | 250 | NM_001163434 |
| <i>Hsp10</i>    | CTGACAGGCTCAATCTCTCCAC, AGGTGGCATTATGCTTCCAG    | 108 | NM_008303    |
| <i>Hsp90b1</i>  | CCTGCTGACCTTCGGGTTTCG, CTGTCCTTGAGCCTTCTCGGC    | 98  | NM_011631    |
| <i>Ldha</i>     | CTTGGCGCTCTACTTGCTGT, CTCATCCGCCAAGTCCTTCA      | 334 | NM_001136069 |
| <i>Pdia4</i>    | CCGTTGACTATGATGGCTCCAGG, GGTCTGTCTGTTCGGTGGCG   | 285 | NM_009787    |
| <i>Pfkm</i>     | CCAGTGCATCTTAACCGACCAT, TCGGGCACTTCCAATCACTG    | 309 | NM_021514    |
| <i>Phka1</i>    | TGAGTGGAGACGGGGTCTTT, TCACGGTCAGCATTTTTGCG      | 404 | NM_008832    |
| <i>Ppargc1a</i> | GACCCTCCTCACACCAAAC, GCGACTGCGGTTGTGTATG        | 91  | XM_006503779 |
| <i>Pygm</i>     | CTCCAGGACATCATCCGACG, TTCACTGTTACGTCCCAGGC      | 200 | NM_011224    |
| <i>Slc25A20</i> | TGGACACTGTTGCTGAGA, TTGGCCAAAGGTATCGAG          | 225 | NM_020520    |
| <i>Sod1</i>     | GAGACCTGGGCAATGTGACT, GTTTACTGCGCAATCCCAAT      | 220 | NM_011434    |
| <i>Txnrd1</i>   | GACTGGCAGCAGCTAAGGAGG, GCTTGTCCGAGCAAAGCTGC     | 166 | NM_001042523 |

---
